# Supplementary material
Source: PubMed Central journal article supplement (PMC6405140)
Supplement: ASN.2018100979SupplementaryData.pdf [file ASN.2018100979SupplementaryData.pdf]

## Supplemental Material

Leaf DE *et al.* Iron, Heparin, and Death in Human Acute Kidney Injury

### Table of Contents

|                                |                                                                                                                                                                    |
|--------------------------------|--------------------------------------------------------------------------------------------------------------------------------------------------------------------|
| <b>Supplemental Table 1</b>    | Enrollment characteristics in the ATN study, all patients versus biorepository subcohort                                                                           |
| <b>Supplemental Table 2</b>    | Assay characteristics                                                                                                                                              |
| <b>Supplemental Table 3</b>    | Iron marker levels on day 8 according to 60-day survival status                                                                                                    |
| <b>Supplemental Table 4</b>    | Odds ratios (and 95% CIs) for death according to iron marker levels – exploratory analysis adjusted for all model 2 and model 3 covariates and all iron parameters |
| <b>Supplemental Table 5</b>    | Enrollment characteristics according to quintiles of catalytic iron                                                                                                |
| <b>Supplemental Table 6</b>    | Univariate and multivariable associations between enrollment characteristics and catalytic iron concentrations                                                     |
| <b>Supplemental Table 7</b>    | Enrollment characteristics according to quintiles of hepcidin                                                                                                      |
| <b>Supplemental Table 8</b>    | Univariate and multivariable associations between enrollment characteristics and hepcidin concentrations                                                           |
| <b>Supplemental Table 9</b>    | Associations between iron and inflammatory parameters                                                                                                              |
| <b>Supplemental Table 10</b>   | Changes in iron markers from day 1 to 8, overall and according to treatment assignment                                                                             |
| <b>Supplemental Figure 1</b>   | Kaplan-Meier survival curves according to quintiles of catalytic iron and hepcidin                                                                                 |
| <b>Supplemental Figure 2</b>   | Associations between catalytic iron and hepcidin with other iron parameters                                                                                        |
| <b>Supplemental Methods</b>    |                                                                                                                                                                    |
| <b>Supplemental References</b> |                                                                                                                                                                    |

| Characteristic                               | All Patients in the ATN Study (n = 1124) | Biorepository Subcohort (n = 817) | P Value |
|----------------------------------------------|------------------------------------------|-----------------------------------|---------|
| <b>Demographics</b>                          |                                          |                                   |         |
| Age, yr, median (IQR)                        | 61 (50–71)                               | 62 (51–72)                        | 0.30    |
| Male sex – no. (%)                           | 793 (71)                                 | 568 (70)                          | 0.60    |
| White race – no. (%)                         | 835 (74)                                 | 628 (77)                          | 0.19    |
| <b>Comorbidities – no. (%)</b>               |                                          |                                   |         |
| Diabetes mellitus                            | 275 (25)                                 | 199 (25)                          | 0.90    |
| Congestive heart failure                     | 260 (24)                                 | 198 (25)                          | 0.63    |
| Chronic liver disease                        | 131 (12)                                 | 95 (12)                           | 0.95    |
| Chronic lung disease <sup>a</sup>            | 135 (12)                                 | 103 (13)                          | 0.74    |
| Chronic kidney disease <sup>b</sup>          | 390 (37)                                 | 293 (38)                          | 0.67    |
| Malignancy                                   | 224 (20)                                 | 158 (19)                          | 0.74    |
| <b>Baseline renal function</b>               |                                          |                                   |         |
| Creatinine, mg/dl, median (IQR) <sup>c</sup> | 1.1 (0.9–1.4)                            | 1.1 (0.9–1.4)                     | 0.94    |
| eGFR, median (IQR) <sup>d</sup>              | 71 (52–94)                               | 71 (50–94)                        | 0.62    |
| <b>Medical ICU – no. (%)</b>                 |                                          |                                   |         |
| 531 (47)                                     | 361 (44)                                 | 0.18                              |         |
| <b>Severity of illness</b>                   |                                          |                                   |         |
| Sepsis – no. (%)                             | 708 (63)                                 | 527 (65)                          | 0.49    |
| APACHE II score, median (IQR) <sup>e</sup>   | 26 (21–32)                               | 26 (21–31)                        | 0.64    |
| Mechanical ventilation – no. (%)             | 905 (81)                                 | 661 (81)                          | 0.86    |
| Shock – no. (%)                              | 695 (62)                                 | 515 (63)                          | 0.59    |
| <b>Enrollment labs, median (IQR)</b>         |                                          |                                   |         |
| White cell count, per mm <sup>3</sup>        | 13 (8–19)                                | 13 (9–19)                         | 0.68    |
| Hemoglobin, g/dl                             | 10 (9–11)                                | 10 (9–11)                         | 0.83    |
| Creatinine, mg/dl                            | 3.9 (2.9–5.1)                            | 3.9 (2.9–5.1)                     | 0.67    |
| Albumin, g/dl                                | 2.3 (1.9–2.9)                            | 2.3 (1.9–2.8)                     | 0.70    |
| <b>60-day mortality – no. (%)</b>            |                                          |                                   |         |
| 591 (53)                                     | 415 (51)                                 | 0.41                              |         |

**Supplemental Table 1. Enrollment characteristics in the ATN study, all patients versus biorepository subcohort.** Percentages are based on the number of patients without missing data.

<sup>a</sup>Defined as chronic hypoxemia, hypercapnea, pulmonary hypertension, or ventilator dependence.

<sup>b</sup>Defined as baseline eGFR < 60 ml/min/1.73m<sup>2</sup>.

<sup>c</sup>Baseline serum creatinine (SCr) was defined as the pre-morbid SCr at the time of screening or, if unavailable, the lowest SCr within 4 days prior to screening.

<sup>d</sup>eGFR is reported in ml/min per 1.73m<sup>2</sup> and was determined using the CKD-EPI equation.

<sup>e</sup>APACHE II score is an ICU severity of illness scoring system ranging from 0 to 71, with higher scores indicating more severe disease.

Abbreviations: APACHE II, Acute Physiology and Chronic Health Evaluation II; eGFR, estimated glomerular filtration rate; ICU, intensive care unit; IQR, interquartile range; SCr, serum creatinine.

| <b>Biomarker</b> | <b>Assay Type</b>    | <b>Manufacturer</b>                   | <b>Lower Limit of detection</b> | <b>Interassay CV (%)</b> |
|------------------|----------------------|---------------------------------------|---------------------------------|--------------------------|
| Catalytic Iron   | Colorimetry          | N/A                                   | 0.03 µmol/L                     | 14.1                     |
| Total Iron       | Ferene Colorimetry   | Teco Diagnostics (Anaheim, CA)        | 2 µg/dl                         | 12.2                     |
| Transferrin      | Immuno- turbidimetry | Beckman Coulter (USA)                 | 1mg/dl                          | 7.7                      |
| TSAT             | N/A                  | N/A                                   | N/A                             | N/A                      |
| Ferritin         | CLIA                 | Maglumi, Snibe                        | 1.3 ng/ml                       | 7.1                      |
| Free Hemoglobin  | ELISA                | My Biosource (USA)                    | 0.625 µg/dl                     | 17.2                     |
| Hepcidin         | ELISA                | Intrinsic LifeSciences (La Jolla, CA) | 0.55 ng/ml                      | 8.0                      |

**Supplemental Table 2. Assay characteristics.** Abbreviations: CLIA, chemiluminescence immunoassay; CV, coefficient of variation (calculated from blinded replicate samples); ELISA, enzyme-linked immunosorbent assay; N/A, not applicable.

|                                | <b>All<br/>(n = 556)</b> | <b>Survivors<br/>(n = 340)</b> | <b>Non-Survivors<br/>(n = 216)</b> | <b>P Value*</b> |
|--------------------------------|--------------------------|--------------------------------|------------------------------------|-----------------|
| <b>Catalytic Iron (µmol/L)</b> | 0.40 (0.28–0.62)         | 0.39 (0.27–0.56)               | 0.43 (0.30–0.71)                   | 0.012           |
| <b>Total Iron (µg/dl)</b>      | 64 (56–72)               | 65 (58–72)                     | 63 (55–73)                         | 0.31            |
| <b>Transferrin (mg/dl)</b>     | 156 (130–182)            | 158 (134–182)                  | 149 (123–178)                      | 0.028           |
| <b>TSAT (%)</b>                | 23 (20–27)               | 23 (20–27)                     | 23 (20–27)                         | 0.26            |
| <b>Ferritin (µg/L)</b>         | 582 (302–1143)           | 550 (295–967)                  | 659 (304–1449)                     | 0.047           |
| <b>Free Hgb (mg/dl)</b>        | 11 (6–20)                | 11 (6–19)                      | 14 (9–21)                          | <0.001          |

**Supplemental Table 3. Iron marker levels on day 8 according to 60-day survival status.** Data are shown as median and interquartile range (25th–75th percentiles). \*P values refer to the comparison between iron parameters in patients alive versus dead at 60 days. For these analyses, only P values <0.01 are considered significant to account for multiple comparisons.

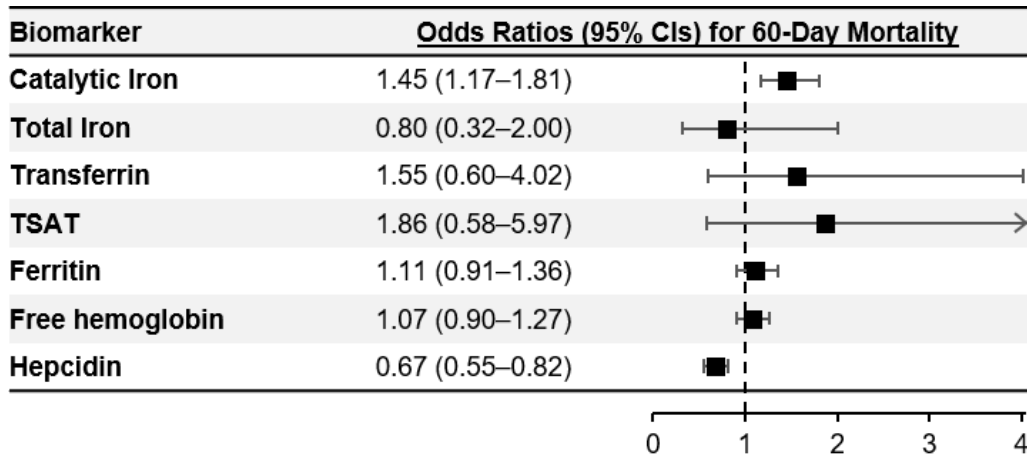

**Supplemental Table 4. Odds ratios (and 95% CIs) for death according to iron marker levels – exploratory analysis adjusted for all model 2 and model 3 covariates and all iron parameters.** These analyses include all model 2 covariates (age, gender, race, baseline eGFR, diabetes mellitus, congestive heart failure, chronic liver disease, and chronic lung disease) and all model 3 covariates (ICU type, mechanical ventilation, APACHE II score, RRT prior to randomization, treatment randomization group, oliguria, sepsis, shock, and serum/plasma levels of albumin, creatinine, and interleukin-6). Additionally, these analyses are adjusted for all iron parameters (catalytic iron, total iron, transferrin, TSAT, ferritin, free hemoglobin, and hepcidin). Each iron parameter is natural log-transformed and standardized to one SD.

| Characteristic                               | Catalytic iron quintiles [range (μmol/L)] |                             |                             |                             |                             |                              | P <sub>trend</sub> |
|----------------------------------------------|-------------------------------------------|-----------------------------|-----------------------------|-----------------------------|-----------------------------|------------------------------|--------------------|
|                                              | All (n = 807)                             | Q1 (n = 160)<br>[0.18–0.33] | Q2 (n = 164)<br>[0.34–0.46] | Q3 (n = 160)<br>[0.47–0.80] | Q4 (n = 161)<br>[0.81–2.12] | Q5 (n = 162)<br>[2.16–47.01] |                    |
| <b>Demographics</b>                          |                                           |                             |                             |                             |                             |                              |                    |
| Age, yr, median (IQR)                        | 62 (51–72)                                | 66 (55–76)                  | 63 (54–73)                  | 63 (50–75)                  | 59 (51–67)                  | 58 (48–69)                   | <0.001             |
| Male sex – no. (%)                           | 561 (70)                                  | 105 (66)                    | 127 (77)                    | 113 (71)                    | 115 (71)                    | 101 (62)                     | 0.04               |
| White race – no. (%)                         | 621 (77)                                  | 121 (76)                    | 132 (80)                    | 112 (70)                    | 131 (81)                    | 125 (77)                     | 0.11               |
| <b>Comorbidities – no. (%)</b>               |                                           |                             |                             |                             |                             |                              |                    |
| Diabetes mellitus                            | 198 (25)                                  | 49 (32)                     | 40 (26)                     | 36 (23)                     | 47 (30)                     | 26 (17)                      | 0.02               |
| Congestive heart failure                     | 197 (25)                                  | 50 (33)                     | 51 (32)                     | 41 (26)                     | 35 (22)                     | 20 (13)                      | <0.001             |
| Chronic liver disease                        | 94 (12)                                   | 13 (8)                      | 8 (5)                       | 12 (8)                      | 24 (15)                     | 37 (24)                      | <0.001             |
| Chronic lung disease <sup>a</sup>            | 102 (13)                                  | 31 (20)                     | 19 (12)                     | 22 (14)                     | 14 (9)                      | 16 (10)                      | 0.03               |
| Chronic kidney disease <sup>b</sup>          | 293 (39)                                  | 63 (41)                     | 69 (45)                     | 64 (43)                     | 57 (38)                     | 40 (26)                      | 0.01               |
| Malignancy                                   | 156 (19)                                  | 26 (16)                     | 27 (16)                     | 30 (19)                     | 33 (21)                     | 40 (25)                      | 0.29               |
| <b>Baseline renal function</b>               |                                           |                             |                             |                             |                             |                              |                    |
| Creatinine, mg/dl, median (IQR) <sup>c</sup> | 1.1 (0.9–1.4)                             | 1.1 (0.9–1.4)               | 1.2 (0.9–1.4)               | 1.1 (0.9–1.4)               | 1.1 (0.9–1.4)               | 0.9 (0.8–1.2)                | <0.001             |
| eGFR, median (IQR) <sup>d</sup>              | 70 (50–93)                                | 68 (47–85)                  | 66 (48–89)                  | 69 (49–97)                  | 68 (50–94)                  | 82 (58–102)                  | <0.001             |
| <b>Medical ICU – no. (%)</b>                 | 356 (44)                                  | 64 (40)                     | 72 (44)                     | 67 (42)                     | 73 (45)                     | 80 (49)                      | 0.50               |
| <b>Severity of illness</b>                   |                                           |                             |                             |                             |                             |                              |                    |
| Sepsis – no. (%)                             | 518 (64)                                  | 87 (54)                     | 97 (59)                     | 102 (64)                    | 109 (68)                    | 123 (76)                     | <0.001             |
| APACHE II score, median (IQR) <sup>e</sup>   | 26 (21–31)                                | 24 (19–29)                  | 26 (20–31)                  | 27 (21–31)                  | 26 (22–31)                  | 27 (22–33)                   | 0.009              |
| Mechanical ventilation – no. (%)             | 652 (81)                                  | 124 (78)                    | 129 (79)                    | 136 (85)                    | 124 (77)                    | 139 (86)                     | 0.11               |
| Shock – no. (%) <sup>f</sup>                 | 508 (63)                                  | 93 (58)                     | 93 (57)                     | 94 (59)                     | 101 (63)                    | 127 (78)                     | <0.001             |
| Oliguria – no. (%) <sup>g</sup>              | 645 (80)                                  | 121 (76)                    | 126 (77)                    | 120 (75)                    | 132 (82)                    | 146 (90)                     | 0.003              |
| RRT prior to randomization – no. (%)         | 558 (69)                                  | 119 (74)                    | 113 (69)                    | 103 (64)                    | 108 (67)                    | 115 (71)                     | 0.36               |
| Days in ICU, median (IQR) <sup>h</sup>       | 4 (3–8)                                   | 5 (3–8)                     | 4 (3–8)                     | 5 (3–8)                     | 4 (3–7)                     | 4 (2–8)                      | 0.14               |
| <b>Enrollment labs, median (IQR)</b>         |                                           |                             |                             |                             |                             |                              |                    |
| White cell count, per mm <sup>3</sup>        | 13 (9–19)                                 | 13 (9–17)                   | 14 (10–19)                  | 13 (8–20)                   | 14 (9–21)                   | 13 (7–22)                    | 0.58               |
| Hemoglobin, g/dl                             | 9.8 (8.9–10.8)                            | 9.7 (9.0–10.4)              | 9.8 (9.1–10.8)              | 10.0 (9.0–10.8)             | 9.7 (8.9–11.0)              | 9.6 (8.6–10.8)               | 0.53               |
| Creatinine, mg/dl                            | 3.9 (2.9–5.1)                             | 3.8 (3.0–4.7)               | 4.0 (2.9–5.3)               | 4.2 (3.3–5.4)               | 4.0 (3.2–5.4)               | 3.4 (2.4–4.7)                | <0.001             |
| Albumin, g/dl                                | 2.3 (1.9–2.8)                             | 2.5 (2.0–3.0)               | 2.3 (2.0–2.8)               | 2.2 (1.7–2.7)               | 2.3 (1.9–2.9)               | 2.3 (1.7–2.8)                | 0.01               |
| IL-6, pg/ml                                  | 166 (74–540)                              | 132 (63–467)                | 165 (62–412)                | 176 (83–709)                | 145 (63–432)                | 252 (114–1053)               | <0.001             |
| <b>60-day mortality – no. (%)</b>            | 409 (51)                                  | 65 (41)                     | 67 (41)                     | 79 (49)                     | 80 (50)                     | 118 (73)                     | <0.001             |

**Supplemental Table 5. Enrollment characteristics according to quintiles of catalytic iron.** Percentages are based on the number of patients without missing data. Abbreviations: APACHE II, Acute Physiology and Chronic Health Evaluation II; eGFR, estimated glomerular filtration rate; ICU, intensive care unit; IQR, interquartile range; RRT, renal replacement therapy. P values were calculated using Kruskal Wallis and chi-squared tests for continuous and categorical variables, respectively, across the five quintiles of catalytic iron.

<sup>a</sup>Defined as chronic hypoxemia, hypercapnea, pulmonary hypertension, or ventilator dependence.

<sup>b</sup>Defined as baseline eGFR<60 ml/min/1.73m<sup>2</sup>.

<sup>c</sup>Baseline serum creatinine (SCr) was defined as the pre-morbid SCr at the time of screening or, if unavailable, the lowest SCr within 4 days prior to screening.

<sup>d</sup>eGFR is reported in ml/min per 1.73m<sup>2</sup> and was determined using the CKD-EPI equation<sup>36</sup>.

<sup>e</sup>APACHE II score is an ICU severity of illness scoring system ranging from 0 to 71, with higher scores indicating more severe disease.

<sup>f</sup>Shock was defined as requirement for vasopressor support for greater than 1 hour.

<sup>g</sup>Oliguria was defined as an average urine output <20 ml/hour for >24 hours.

<sup>h</sup>Prior to randomization.

| Characteristic                        | Univariate |                  | Multivariable |                  |
|---------------------------------------|------------|------------------|---------------|------------------|
|                                       | $\beta$    | P value          | $\beta$       | P value          |
| <b>Demographics</b>                   |            |                  |               |                  |
| Age, yr                               | -0.01      | <b>&lt;0.001</b> | -0.006        | 0.06             |
| Male sex                              | -0.09      | 0.25             |               |                  |
| White race                            | -0.02      | 0.75             |               |                  |
| <b>Comorbidities</b>                  |            |                  |               |                  |
| Diabetes mellitus                     | -0.19      | <b>0.02</b>      | -0.06         | 0.45             |
| Congestive heart failure              | -0.39      | <b>&lt;0.001</b> | -0.27         | <b>0.002</b>     |
| Chronic liver disease                 | 0.64       | <b>&lt;0.001</b> | 0.45          | <b>&lt;0.001</b> |
| Chronic lung disease <sup>a</sup>     | -0.27      | <b>0.009</b>     | -0.26         | <b>0.02</b>      |
| Chronic kidney disease <sup>b</sup>   | -0.23      | <b>0.002</b>     | 0.09          | 0.46             |
| Malignancy                            | 0.16       | 0.08             |               |                  |
| <b>Baseline renal function</b>        |            |                  |               |                  |
| Creatinine, mg/dl <sup>c</sup>        | -0.42      | <b>&lt;0.001</b> | -0.33         | 0.17             |
| eGFR <sup>d</sup>                     | 0.006      | <b>&lt;0.001</b> | -0.001        | 0.71             |
| <b>Medical ICU</b>                    |            |                  |               |                  |
| <b>Severity of illness</b>            |            |                  |               |                  |
| Sepsis                                | 0.28       | <b>&lt;0.001</b> | 0.19          | <b>0.01</b>      |
| APACHE II score <sup>e</sup>          | 0.02       | <b>&lt;0.001</b> | 0.01          | <b>0.02</b>      |
| Mechanical ventilation                | 0.17       | 0.052            |               |                  |
| Shock <sup>f</sup>                    | 0.34       | <b>&lt;0.001</b> | 0.24          | <b>0.004</b>     |
| Oliguria <sup>g</sup>                 | 0.34       | <b>&lt;0.001</b> | 0.15          | 0.12             |
| RRT prior to randomization            | -0.005     | 0.95             |               |                  |
| Days in ICU <sup>h</sup>              | -0.0009    | 0.79             |               |                  |
| <b>Enrollment labs</b>                |            |                  |               |                  |
| White cell count, per mm <sup>3</sup> | 0.0003     | 0.36             |               |                  |
| Hemoglobin, g/dl                      | -0.02      | 0.34             |               |                  |
| Creatinine, mg/dl                     | -0.05      | <b>0.008</b>     | -0.01         | 0.62             |
| Albumin, g/dl                         | -0.09      | 0.10             |               |                  |
| IL-6, ln (pg/ml)                      | 0.16       | <b>&lt;0.001</b> | 0.10          | <b>0.01</b>      |

**Supplemental Table 6. Univariate and multivariable associations between enrollment characteristics and catalytic iron concentrations.** Catalytic iron concentrations were natural log-transformed. Characteristics that were significant ( $P < 0.05$ ) in univariate analyses were included in multivariable analyses.

<sup>a</sup>Defined as chronic hypoxemia, hypercapnea, pulmonary hypertension, or ventilator dependence.

<sup>b</sup>Defined as baseline eGFR  $< 60$  ml/min/1.73m<sup>2</sup>.

<sup>c</sup>Baseline serum creatinine (SCr) was defined as the pre-morbid SCr at the time of screening or, if unavailable, the lowest SCr within 4 days prior to screening.

<sup>d</sup>eGFR is reported in ml/min per 1.73m<sup>2</sup> and was determined using the CKD-EPI equation <sup>36</sup>.

<sup>e</sup>APACHE II score is an ICU severity of illness scoring system ranging from 0 to 71, with higher scores indicating more severe disease.

<sup>f</sup>Shock was defined as requirement for vasopressor support for greater than 1 hour.

<sup>g</sup>Oliguria was defined as an average urine output  $< 20$  ml/hour for  $> 24$  hours.

<sup>h</sup>Prior to randomization.

| Characteristic                               | Hepcidin quintiles [range (ng/ml)] |                        |                         |                          |                           |                            | P <sub>trend</sub> |
|----------------------------------------------|------------------------------------|------------------------|-------------------------|--------------------------|---------------------------|----------------------------|--------------------|
|                                              | All (n = 802)                      | Q1 (n = 160)<br>[4–33] | Q2 (n = 160)<br>[33–86] | Q3 (n = 160)<br>[86–163] | Q4 (n = 161)<br>[163–266] | Q5 (n = 161)<br>[266–2415] |                    |
| <b>Demographics</b>                          |                                    |                        |                         |                          |                           |                            |                    |
| Age, yr, median (IQR)                        | 62 (51–72)                         | 59 (51–69)             | 64 (53–75)              | 65 (53–74)               | 63 (54–74)                | 61 (47–69)                 | 0.002              |
| Male sex – no. (%)                           | 560 (70)                           | 100 (63)               | 105 (66)                | 114 (71)                 | 120 (75)                  | 121 (75)                   | 0.05               |
| White race – no. (%)                         | 615 (77)                           | 134 (84)               | 122 (76)                | 122 (76)                 | 123 (76)                  | 114 (71)                   | 0.11               |
| <b>Comorbidities – no. (%)</b>               |                                    |                        |                         |                          |                           |                            |                    |
| Diabetes mellitus                            | 196 (25)                           | 32 (20)                | 45 (28)                 | 47 (31)                  | 36 (23)                   | 36 (24)                    | 0.18               |
| Congestive heart failure                     | 193 (25)                           | 53 (34)                | 42 (27)                 | 49 (32)                  | 29 (19)                   | 20 (13)                    | <0.001             |
| Chronic liver disease                        | 95 (12)                            | 43 (28)                | 26 (17)                 | 14 (9)                   | 8 (5)                     | 4 (3)                      | <0.001             |
| Chronic lung disease <sup>a</sup>            | 102 (13)                           | 19 (12)                | 17 (11)                 | 22 (14)                  | 20 (13)                   | 24 (15)                    | 0.75               |
| Chronic kidney disease <sup>b</sup>          | 288 (38)                           | 52 (34)                | 62 (40)                 | 58 (40)                  | 63 (42)                   | 53 (35)                    | 0.61               |
| Malignancy                                   | 115 (19)                           | 22 (14)                | 33 (21)                 | 24 (15)                  | 33 (21)                   | 43 (27)                    | 0.03               |
| <b>Baseline renal function</b>               |                                    |                        |                         |                          |                           |                            |                    |
| Creatinine, mg/dl, median (IQR) <sup>c</sup> | 1.1 (0.9–1.4)                      | 1.0 (0.9–1.4)          | 1.0 (0.8–1.4)           | 1.1 (0.9–1.4)            | 1.1 (0.9–1.3)             | 1.1 (0.9–1.4)              | 0.76               |
| eGFR, median (IQR) <sup>d</sup>              | 71 (50–94)                         | 71 (52–88)             | 71 (49–94)              | 69 (49–93)               | 67 (51–93)                | 75 (53–97)                 | 0.59               |
| <b>Medical ICU – no. (%)</b>                 | 356 (44)                           | 71 (44)                | 74 (46)                 | 63 (39)                  | 70 (43)                   | 78 (48)                    | 0.56               |
| <b>Severity of illness</b>                   |                                    |                        |                         |                          |                           |                            |                    |
| Sepsis – no. (%)                             | 520 (65)                           | 91 (57)                | 113 (71)                | 105 (66)                 | 101 (63)                  | 110 (68)                   | 0.09               |
| APACHE II score, median (IQR) <sup>e</sup>   | 26 (21–31)                         | 27 (22–31)             | 28 (22–32)              | 25 (21–30)               | 24 (20–29)                | 27 (21–32)                 | 0.002              |
| Mechanical ventilation – no. (%)             | 649 (81)                           | 128 (80)               | 135 (84)                | 132 (83)                 | 123 (76)                  | 131 (81)                   | 0.44               |
| Shock – no. (%) <sup>f</sup>                 | 507 (63)                           | 111 (69)               | 117 (73)                | 104 (65)                 | 98 (61)                   | 77 (48)                    | <0.001             |
| Oliguria – no. (%) <sup>g</sup>              | 642 (80)                           | 135 (84)               | 140 (88)                | 127 (79)                 | 120 (75)                  | 120 (75)                   | 0.009              |
| RRT prior to randomization – no. (%)         | 550 (69)                           | 123 (77)               | 113 (71)                | 115 (72)                 | 104 (65)                  | 95 (59)                    | 0.007              |
| Days in ICU, median (IQR) <sup>h</sup>       | 4 (3–8)                            | 4 (3–8)                | 4 (3–8)                 | 4 (3–8)                  | 4 (3–8)                   | 5 (3–9)                    | 0.94               |
| <b>Enrollment labs, median (IQR)</b>         |                                    |                        |                         |                          |                           |                            |                    |
| White cell count, per mm <sup>3</sup>        | 13 (9–19)                          | 14 (5–19)              | 15 (11–22)              | 13 (8–18)                | 13 (10–18)                | 12 (7–18)                  | 0.002              |
| Hemoglobin, g/dl                             | 9.8 (8.9–10.8)                     | 9.5 (8.5–10.4)         | 9.9 (9.1–11.0)          | 9.8 (8.9–10.9)           | 10.0 (9.1–10.8)           | 9.7 (8.9–10.7)             | 0.009              |
| Creatinine, mg/dl                            | 3.9 (2.9–5.1)                      | 3.5 (2.6–4.7)          | 3.6 (2.8–4.8)           | 3.6 (2.7–4.7)            | 4.1 (3.2–5.3)             | 4.8 (3.6–6.3)              | <0.001             |
| Albumin, g/dl                                | 2.3 (1.9–2.8)                      | 2.6 (2.1–3.1)          | 2.4 (1.8–2.9)           | 2.2 (1.8–2.8)            | 2.3 (1.9–2.7)             | 2.2 (1.8–2.7)              | <0.001             |
| IL-6, pg/ml                                  | 166 (74–523)                       | 124 (58–328)           | 145 (61–575)            | 145 (59–466)             | 179 (101–467)             | 235 (103–1003)             | <0.001             |
| <b>60-day mortality – no. (%)</b>            | 409 (51)                           | 101 (63)               | 92 (58)                 | 84 (53)                  | 70 (43)                   | 62 (39)                    | <0.001             |

**Supplemental Table 7. Enrollment characteristics according to quintiles of hepcidin.** Percentages are based on the number of patients without missing data. Abbreviations: APACHE II, Acute Physiology and Chronic Health Evaluation II; eGFR, estimated glomerular filtration rate; ICU, intensive care unit; IQR, interquartile range; RRT, renal replacement therapy. P values were calculated using Kruskal Wallis and chi-squared tests for continuous and categorical variables, respectively, across the five quintiles of hepcidin.

<sup>a</sup>Defined as chronic hypoxemia, hypercapnea, pulmonary hypertension, or ventilator dependence.

<sup>b</sup>Defined as baseline eGFR < 60 ml/min/1.73m<sup>2</sup>.

<sup>c</sup>Baseline serum creatinine (SCr) was defined as the pre-morbid SCr at the time of screening or, if unavailable, the lowest SCr within 4 days prior to screening.

<sup>d</sup>eGFR is reported in ml/min per 1.73m<sup>2</sup> and was determined using the CKD-EPI equation<sup>36</sup>.

<sup>e</sup>APACHE II score is an ICU severity of illness scoring system ranging from 0 to 71, with higher scores indicating more severe disease.

<sup>f</sup>Shock was defined as requirement for vasopressor support for greater than 1 hour.

<sup>g</sup>Oliguria was defined as an average urine output < 20 ml/hour for > 24 hours.

<sup>h</sup>Prior to randomization.



| Characteristic                        | Univariate |                  | Multivariable |                  |
|---------------------------------------|------------|------------------|---------------|------------------|
|                                       | $\beta$    | P value          | $\beta$       | P value          |
| <b>Demographics</b>                   |            |                  |               |                  |
| Age, yr                               | -0.0004    | 0.87             |               |                  |
| Male sex                              | 0.25       | <b>0.001</b>     | 0.08          | 0.34             |
| White race                            | 0.11       | <b>0.046</b>     | 0.06          | 0.37             |
| <b>Comorbidities</b>                  |            |                  |               |                  |
| Diabetes mellitus                     | 0.03       | 0.76             |               |                  |
| Congestive heart failure              | -0.37      | <b>&lt;0.001</b> | -0.21         | <b>0.02</b>      |
| Chronic liver disease                 | -0.82      | <b>&lt;0.001</b> | -0.71         | <b>&lt;0.001</b> |
| Chronic lung disease <sup>a</sup>     | 0.07       | 0.53             |               |                  |
| Chronic kidney disease <sup>b</sup>   | 0.02       | 0.80             |               |                  |
| Malignancy                            | 0.25       | <b>0.005</b>     | 0.19          | <b>0.04</b>      |
| <b>Baseline renal function</b>        |            |                  |               |                  |
| Creatinine, mg/dl <sup>c</sup>        | 0.10       | 0.32             |               |                  |
| eGFR <sup>d</sup>                     | 0.002      | 0.27             |               |                  |
| Medical ICU                           | -0.03      | 0.65             |               |                  |
| <b>Severity of illness</b>            |            |                  |               |                  |
| Sepsis                                | 0.15       | <b>0.046</b>     | 0.13          | 0.08             |
| APACHE II score <sup>e</sup>          | -0.007     | 0.15             |               |                  |
| Mechanical ventilation                | -0.03      | 0.74             |               |                  |
| Shock <sup>f</sup>                    | -0.33      | <b>&lt;0.001</b> | -0.28         | <b>&lt;0.001</b> |
| Oliguria <sup>g</sup>                 | -0.25      | <b>0.004</b>     | -0.14         | 0.13             |
| RRT prior to randomization            | -0.24      | <b>0.001</b>     | -0.16         | <b>0.045</b>     |
| Days in ICU <sup>h</sup>              | 0.004      | 0.25             |               |                  |
| <b>Enrollment labs</b>                |            |                  |               |                  |
| White cell count, per mm <sup>3</sup> | -0.0006    | 0.08             |               |                  |
| Hemoglobin, g/dl                      | 0.02       | 0.29             |               |                  |
| Creatinine, mg/dl                     | 0.08       | <b>&lt;0.001</b> | 0.08          | <b>&lt;0.001</b> |
| Albumin, g/dl                         | -0.24      | <b>&lt;0.001</b> | -0.10         | 0.053            |
| IL-6, pg/ml                           | 0.14       | <b>&lt;0.001</b> | 0.19          | <b>&lt;0.001</b> |

**Supplemental Table 8. Univariate and multivariable associations between enrollment characteristics and hepcidin concentrations.** Heparin concentrations were natural log-transformed. Characteristics that were significant ( $P < 0.05$ ) in univariate analyses were included in multivariable analyses.

<sup>a</sup>Defined as chronic hypoxemia, hypercapnea, pulmonary hypertension, or ventilator dependence.

<sup>b</sup>Defined as baseline eGFR  $< 60$  ml/min/1.73m<sup>2</sup>.

<sup>c</sup>Baseline serum creatinine (SCr) was defined as the pre-morbid SCr at the time of screening or, if unavailable, the lowest SCr within 4 days prior to screening.

<sup>d</sup>eGFR is reported in ml/min per 1.73m<sup>2</sup> and was determined using the CKD-EPI equation <sup>36</sup>.

<sup>e</sup>APACHE II score is an ICU severity of illness scoring system ranging from 0 to 71, with higher scores indicating more severe disease.

<sup>f</sup>Shock was defined as requirement for vasopressor support for greater than 1 hour.

<sup>g</sup>Oliguria was defined as an average urine output  $< 20$  ml/hour for  $> 24$  hours.

<sup>h</sup>Prior to randomization.

|                | Total Iron | Transferrin | TSAT     | Ferritin | Free Hgb | Hepcidin | IL-6     |
|----------------|------------|-------------|----------|----------|----------|----------|----------|
| Catalytic Iron | 0.11**     | -0.19***    | 0.23***  | 0.46***  | 0.23***  | -0.20*** | 0.12***  |
| Total Iron     | ---        | 0.20***     | 0.60***  | 0.06     | 0.06     | -0.06    | -0.10**  |
| Transferrin    | ---        | ---         | -0.61*** | -0.17*** | 0.01     | -0.21*** | -0.16*** |
| TSAT           | ---        | ---         | ---      | 0.17***  | 0.02     | 0.11**   | 0.06     |
| Ferritin       | ---        | ---         | ---      | ---      | 0.11**   | 0.06     | 0.18***  |
| Free Hgb       | ---        | ---         | ---      | ---      | ---      | -0.18*** | 0.13***  |
| Hepcidin       | ---        | ---         | ---      | ---      | ---      | ---      | 0.16***  |

**Supplemental Table 9. Associations between iron and inflammatory parameters.**

Spearman correlation coefficients are shown for each comparison. \*P<0.05; \*\*P<0.01; \*\*\*P<0.001. Abbreviations: Hgb, hemoglobin; TSAT, transferrin saturation.

|                                | N   | Day1              | Day8              | ΔDay8-Day1          | P value <sup>a</sup> | P value <sup>b</sup> |
|--------------------------------|-----|-------------------|-------------------|---------------------|----------------------|----------------------|
| <b>Catalytic Iron (μmol/L)</b> |     |                   |                   |                     |                      |                      |
| Overall                        | 556 | 0.55 (0.34, 1.21) | 0.40 (0.28, 0.62) | -0.12 (-0.69, 0.05) | <0.001               |                      |
| Intensive RRT                  | 267 | 0.54 (0.34, 1.20) | 0.37 (0.27, 0.59) | -0.14 (-0.74, 0.02) | <0.001               |                      |
| Less-Intensive RRT             | 289 | 0.55 (0.35, 1.22) | 0.43 (0.30, 0.68) | -0.10 (-0.65, 0.11) | <0.001               | 0.03                 |
| <b>Total Iron (μg/dL)</b>      |     |                   |                   |                     |                      |                      |
| Overall                        | 556 | 65 (54, 81)       | 64 (56, 72)       | -1 (-20, 13)        | <0.001               |                      |
| Intensive RRT                  | 267 | 64 (54, 82)       | 64 (56, 72)       | -2 (-20, 12)        | 0.04                 |                      |
| Less-Intensive RRT             | 289 | 65 (55, 80)       | 64 (57, 73)       | -1 (-19, 13)        | 0.08                 | 0.84                 |
| <b>Transferrin (mg/dL)</b>     |     |                   |                   |                     |                      |                      |
| Overall                        | 556 | 134 (110, 161)    | 156 (130, 182)    | 19 (-6, 44)         | <0.001               |                      |
| Intensive RRT                  | 267 | 132 (108, 163)    | 156 (129, 182)    | 19 (-4, 44)         | <0.001               |                      |
| Less-Intensive RRT             | 289 | 135 (113, 160)    | 156 (130, 179)    | 10 (-7, 44)         | <0.001               | 0.79                 |
| <b>TSAT (%)</b>                |     |                   |                   |                     |                      |                      |
| Overall                        | 556 | 26 (22, 32)       | 23 (20, 27)       | -3 (-8, 1)          | <0.001               |                      |
| Intensive RRT                  | 267 | 26 (22, 32)       | 23 (20, 27)       | -3 (-8, 2)          | <0.001               |                      |
| Less-Intensive RRT             | 289 | 26 (22, 32)       | 23 (20, 27)       | -3 (-8, 1)          | <0.001               | 0.89                 |
| <b>Ferritin (μg/L)</b>         |     |                   |                   |                     |                      |                      |
| Overall                        | 556 | 744 (356, 1975)   | 582 (302, 1143)   | -89 (-845, 113)     | <0.001               |                      |
| Intensive RRT                  | 267 | 735 (338, 1916)   | 603 (296, 1120)   | -86 (-756, 127)     | <0.001               |                      |
| Less-Intensive RRT             | 289 | 756 (364, 2013)   | 566 (307, 1190)   | -91 (-926, 100)     | <0.001               | 0.73                 |
| <b>Free hemoglobin (mg/dL)</b> |     |                   |                   |                     |                      |                      |
| Overall                        | 556 | 11.3 (6.4, 20.4)  | 11.3 (6.4, 19.6)  | -0.2 (-7.1, 6.4)    | 0.89                 |                      |
| Intensive RRT                  | 267 | 12.0 (6.7, 21.3)  | 11.2 (6.2, 18.7)  | -1.1 (-9.5, 5.1)    | 0.06                 |                      |
| Less-Intensive RRT             | 289 | 10.6 (6.3, 19.9)  | 11.8 (7.1, 21.2)  | 1.0 (-5.5, 8.3)     | 0.11                 | 0.01                 |

**Supplemental Table 10. Changes in iron markers from day 1 to 8, overall and according to treatment assignment.** Data are shown as median (interquartile range), and are restricted to patients with iron marker levels available on both days 1 and 8 (n=556). <sup>a</sup>Comparison of change in iron marker levels from day 1 to day 8. <sup>b</sup>Comparison of change in iron marker levels from day 1 to day 8 in patients assigned to intensive versus less-intensive RRT. Patients assigned to intensive RRT received intermittent hemodialysis or sustained low-efficiency dialysis six times per week (every day except Sunday) or continuous venovenous hemodiafiltration at a total effluent flow rate of 35 ml per kilogram of body weight per hour. Patients assigned to less-intensive RRT received intermittent hemodialysis or sustained low-efficiency dialysis three times per week (on alternate days except Sunday) or continuous venovenous hemodiafiltration at a total effluent flow rate of 20 ml per kilogram per hour. Abbreviations: RRT, renal replacement therapy; TSAT, transferrin saturation.

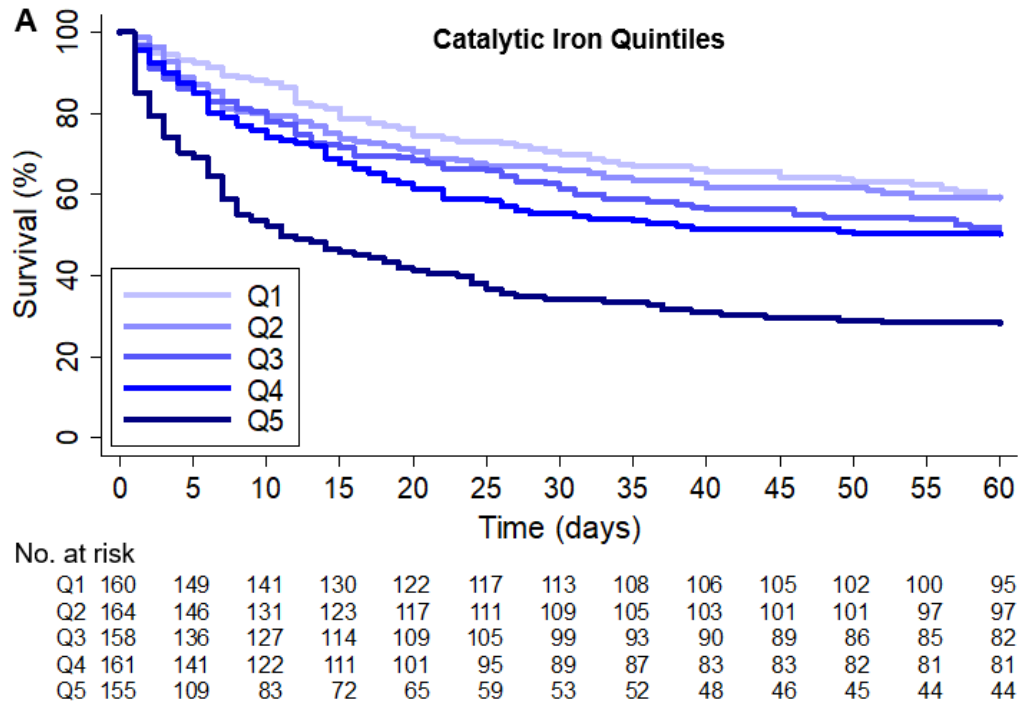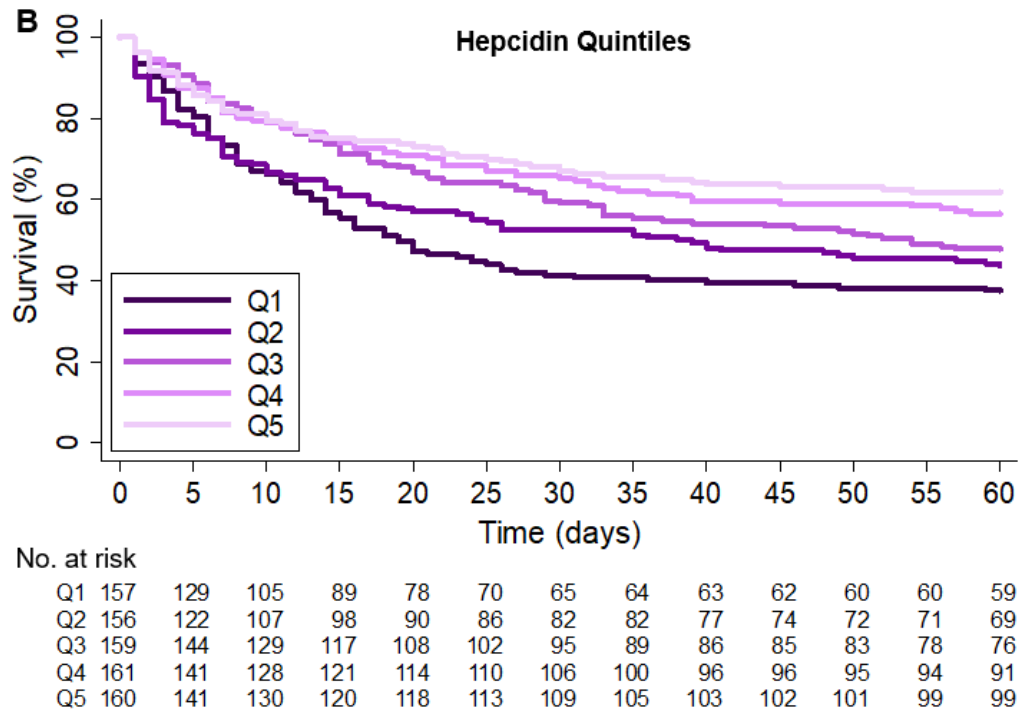

**Supplemental Figure 1. Kaplan-Meier survival curves according to quintiles of catalytic iron and hepcidin.**

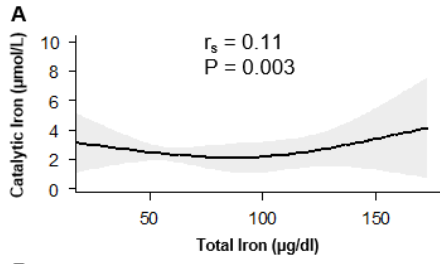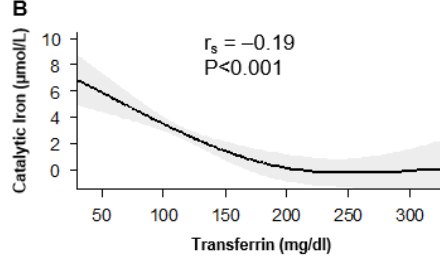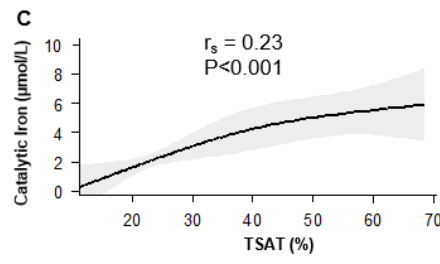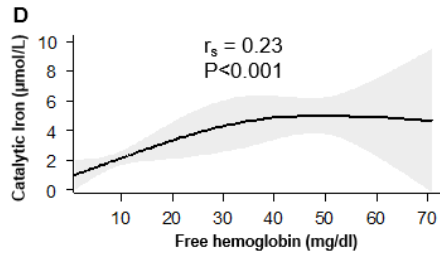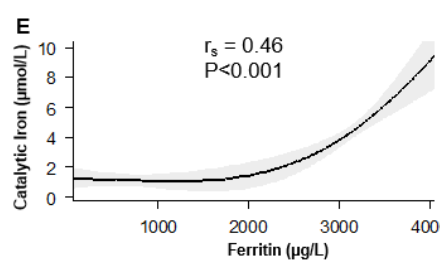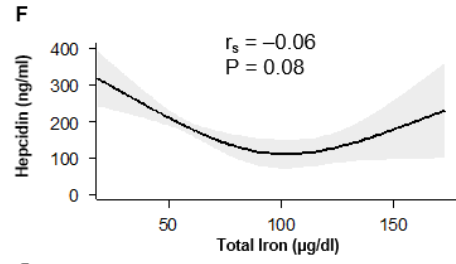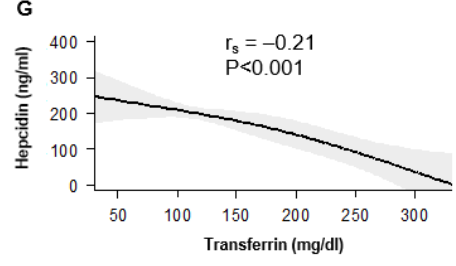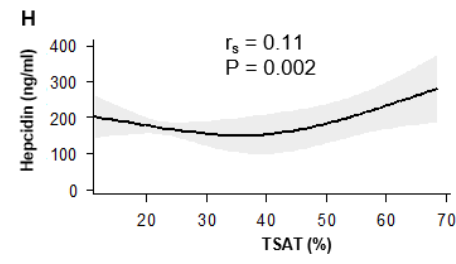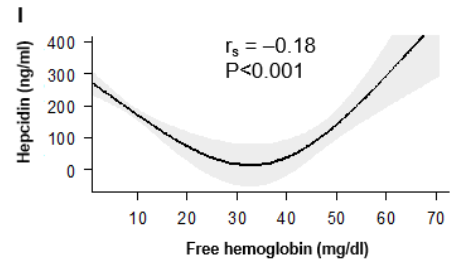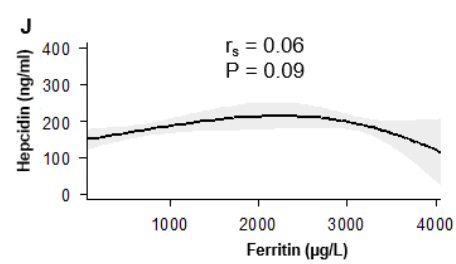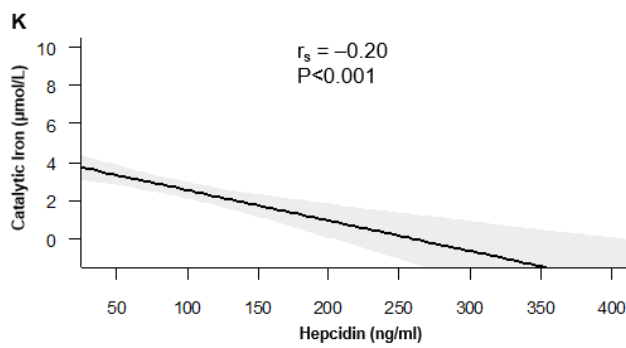

**Supplemental Figure 2. Associations between catalytic iron and hepcidin with other iron parameters.** Restricted cubic spline graphs depict the relationships between catalytic iron and hepcidin with total iron (panels A and F), transferrin (panels B and G), TSAT (panels C and H), free hemoglobin (panels D and I), and ferritin (panels E and J). The relationship between catalytic iron and hepcidin is shown in panel K. For each graph, three knots were specified at the 10<sup>th</sup>, 50<sup>th</sup>, and 90<sup>th</sup> percentiles. The 95% confidence intervals are indicated by the shaded areas. Abbreviations:  $r_s$ , spearman correlation coefficient; TSAT, transferrin saturation.

## Supplemental Methods

**Plasma Catalytic Iron Measurement.** Plasma catalytic iron ( $\mu\text{mol/l}$ ) was measured using the modified bleomycin assay as described by us previously.<sup>1</sup> The measurement of catalytic iron in plasma samples is based on the reaction of the antitumor antibiotic bleomycin with DNA in the presence of iron and suitable reducing agent to bind and degrade it. The DNA degradation products react with thiobarbituric acid to form a chromogen to be measured at 532 nm spectrophotometrically. The assay detects iron capable of catalyzing free radical reactions in plasma. A Beckman (DU800) spectrophotometer was used to measure the intensity of the colored assay product.

**Plasma Free Hemoglobin Measurement.** Plasma free hemoglobin (mg/dl) was measured using an ELISA kit (catalogue # MBS 564144, "My Biosource" company). Free hemoglobin present in the samples was sandwiched between two anti-hemoglobin antibodies, one bound to the wall of the microtitre well while the other was conjugated to horseradish peroxidase enzyme. The quantity of bound enzyme varies directly with the concentration of the free hemoglobin in the sample. The intensity of the colored product developed by the enzyme from specific chromogenic substrate added to the assay was measured quantitatively at 450 nm using a Bio-Rad microplate reader (model #PR4100).

**Plasma Total Iron Measurement.** Plasma total iron ( $\mu\text{g/dl}$ ) was measured using the Ferene colorimetric assay using a commercial kit (Teco Diagnostics, Anaheim, CA) following the modification used by Walmsley et al, 1992.<sup>2</sup> The iron in EDTA plasma was dissociated from its Fe (III)-Transferrin complex by the addition of an acidic buffer containing hydroxylamine and 7.7mmol/l zinc sulphate heptahydrate (AR grade, BDH Laboratory Chemicals). The colored Fe (II) complex with the chromogenic reagent Ferene was measured at 560 nm in a semi automated biochemistry analyzer, (Chem 7, ERBA Mannheim, Transasia).

**Plasma Transferrin Measurement.** Plasma transferrin (mg/dl) was measured in an automated clinical chemistry analyser (AU480, Beckman Coulter, USA) using a commercial immunoturbidimetry kit (OSR 6152, Beckman Coulter, USA).

**Plasma Total Iron Binding Capacity (TIBC) Estimation.** Plasma TIBC ( $\mu\text{g/dL}$ ) was estimated from the plasma transferrin concentration, since TIBC cannot be measured directly in EDTA plasma. The estimation is based on the molecular weight of transferrin (80kD) and the known ratio of TIBC to transferrin.<sup>3</sup>

**Plasma Ferritin Measurement.** Plasma ferritin (ng/ml) was measured by a two site immunoenzymometric assay kit (Tosoh Corporation, Japan) using the automate Tosoh AIA 360 analyzer. Ferritin present in the test sample was bound with a monoclonal antibody immobilized on a magnetic solid phase and enzyme-labeled monoclonal antibody in the AIA Pack test cups. The magnetic beads were washed to remove the unbound enzyme-labeled monoclonal antibody and were incubated with a fluorogenic substrate. The amount of enzyme-labeled monoclonal antibody that binds to the beads is directly proportional to the ferritin level in the plasma sample.

**Plasma Hepcidin Measurement.** Plasma hepcidin was measured using a commercial, solid-phase, competitive ELISA (Intrinsic LifeSciences, La Jolla, CA) that utilizes a monoclonal anti-hepcidin antibody. The assay is designed specifically for the quantification of hepcidin-25, the bioactive 25-amino acid peptide, in human EDTA plasma samples.

## Supplemental References

1. Lele S, McCullough PA, Rajapurkar M. Serum catalytic iron as a novel biomarker of vascular injury in acute coronary syndromes. *EuroIntervention* 2009; 5:336-342.
2. Walmsley TA, George PM, Fowler RT. Colorimetric measurement of iron in plasma samples anticoagulated with EDTA. *J Clin Pathol* 1992; 45:151-154.
3. Gambino R, Desvarieux E, Orth M, Matan H, Ackattupathil T, Lijoi E, Wimmer C, Bower J, Gunter E. The relation between chemically measured total iron-binding capacity concentrations and immunologically measured transferrin concentrations in human serum. *Clin Chem* 1997; 43(12):2408-2412.
